# Supplementary material for: Electrocardiographic Abnormalities in Hospitalized Patients with COVID-19 and the Associations with Clinical Outcome
Source: MDPI journal article supplement (doi:10.3390/jcm11175248), 2022-09-05
Supplement: s1 [file s1]

## Supplementary Materials

**Supplementary Table S1.** Linear bivariate correlation between demographic/serological features and electrocardiographic findings at baseline.

|         | All Patients |                |       |                |          |                |               |                |       |                |
|---------|--------------|----------------|-------|----------------|----------|----------------|---------------|----------------|-------|----------------|
|         | Age          |                | CRP   |                | Ferritin |                | Procalcitonin |                | BNP   |                |
|         | CC           | <i>p</i> Value | CC    | <i>p</i> Value | CC       | <i>p</i> Value | CC            | <i>p</i> Value | CC    | <i>p</i> Value |
| HR      |              |                |       |                |          |                |               |                |       |                |
| RR      | -0.39        | <0.0001        | -0.21 | 0.034          | -0.33    | 0.29           | -0.47         | <0.0001        | -0.29 | 0.005          |
| PR      | -            | ns             | -     | ns             | -        | ns             | -             | ns             | -     | ns             |
| QRS     | -            | ns             | -     | ns             | -        | ns             | -             | ns             | -     | ns             |
| QT      | -            | ns             | -     | ns             | -        | ns             | -             | ns             | -     | ns             |
| QTc     | 0.27         | 0.004          | 0.28  | 0.003          | -        | ns             | 0.37          | <0.0001        | 0.22  | 0.032          |
| QT max  | -            | ns             | 0.28  | 0.004          | -        | ns             | 0.43          | <0.0001        | -     | ns             |
| QT min  | -            | ns             | 0.24  | 0.013          | -        | ns             | 0.24          | 0.019          | -     | ns             |
| QTD     | -            | ns             | -     | ns             | -0.22    | 0.048          | -             | ns             | -     | ns             |
| QTc max | 0.246        | 0.009          | -     | ns             | -        | ns             | -             | ns             | 0.254 | 0.013          |
| QTc min | 0.297        | 0.002          | -     | ns             | -        | ns             | -             | ns             | -     | ns             |
| QTcD    | -            | ns             | -     | ns             | -        | ns             | 0.254         | 0.014          | -     | ns             |
| JTD     | -            | ns             | -     | ns             | -        | ns             | -             | ns             | -     | ns             |
| JTcD    | 0.315        | 0.001          | 0.240 | 0.014          | -        | ns             | 0.312         | 0.002          | -     | ns             |

*CC, Spearman's rho correlation coefficient; HR, heart rate; CRP, C reactive protein; BNP, brain natriuretic peptide*

**Supplementary Table S2.** Comparison of clinical and serological features at admission and at discharge in the 95 patients that recovered from SARS-CoV-2 infection.

|                  | Admission | Discharge  | <i>p</i> Value |
|------------------|-----------|------------|----------------|
| N/L ratio        | 5.7±4.8   | 4.4±6.5    | <0.001         |
| ESR (mm/1h)      | 57.4±24.5 | 62.7±34.5  | 0.180          |
| CRP (mg/L)       | 18.2±64   | 1.55±2.5   | <0.001         |
| Ferritin (ng/mL) | 478.2±441 | 356.4±269  | <0.001         |
| Procalcitonin    | 4.1±33.8  | 0.72±3.2   | <0.001         |
| SO2 in AA (%)    | 94.9±2.4  | 95.7±2.1   | 0.043          |
| PaO2/FiO2        | 279±92.9  | 337.5±85.9 | 0.214          |

Values are shown as mean ± standard deviation. HR, heart rate.
